# Supplementary material for: Real-World Effectiveness of Natalizumab Extended Interval Dosing in a French Cohort
Source: PubMed Central journal article supplement — Neurol Ther. 2023 Feb 10;12(2):529–42. doi: 10.1007/s40120-023-00440-5 (PMC10043118; doi:10.1007/s40120-023-00440-5), 2023-02-10
Supplement: 40120_2023_440_MOESM1_ESM.pdf [file 40120_2023_440_MOESM1_ESM.pdf]

## Supplement

### Real-World Effectiveness of Natalizumab Extended Interval Dosing in a French Cohort

Juliette Pelle, MD<sup>1</sup>, Anais R Briant, MS<sup>2</sup>, Pierre Branger, MD<sup>1</sup> Nathalie Derache, MD<sup>1</sup>,  
Charlotte Arnaud, MD<sup>1</sup>, Christine Lebrun-Frenay, MD, PhD<sup>3</sup>, Mikael Cohen, MD<sup>3</sup>, Lydiane  
Mondot, MD<sup>3</sup>, Jerome De Seze, MD, PhD<sup>4</sup>, Kevin Bigaut, MD<sup>4</sup>, Nicolas Collongues, MD,  
PhD<sup>4</sup>, Laurent Kremer, MD, PhD<sup>4</sup>, Damien Ricard, MD, PhD<sup>5</sup>, Flavie Bompaire, MD<sup>5</sup>,  
Charlotte Ohlmann, MD<sup>6</sup>, Magali Sallansonnet-Froment, MD<sup>5</sup>, Jonathan Ciron, MD<sup>7</sup>, Damien  
Biotti, MD<sup>7</sup>, Beatrice Pignolet, PhD<sup>7</sup>, Jean-Jacques Parienti, MD, PhD<sup>2</sup>, and Gilles Defer, MD<sup>1</sup>

<sup>1</sup>Centre de Ressources et Compétence Sclérose en Plaques (CRCSEP), Service de Neurologie, CHU de Caen-Cote de Nacre, Caen, France; <sup>2</sup>Unité de Biostatistiques et de Recherche Clinique, CHU de Caen-Cote de Nacre, Caen, France; <sup>3</sup>Centre de Ressources et Compétence Sclérose en plaques (CRCSEP), Unité de Recherche Clinique Côte d'azur (UR2CA), équipe URRIS. CHU Pasteur 2, Nice, France; <sup>4</sup>Centre de Ressources et Compétence Sclérose en plaques (CRCSEP), Département de Neurologie, CHRU de Strasbourg Hôpital de Hautepierre, Strasbourg, France; <sup>5</sup>Département de Neurologie, Hôpital d'Instruction des Armées Percy, Service de Santé des Armées, Clamart, France; <sup>6</sup>Département de Radiologie, Hôpital d'Instruction des Armées Percy, Service de Santé des Armées, Clamart, France; <sup>7</sup>Centre de Ressources et Compétence Sclérose en plaques (CRCSEP) – Département des Neurosciences, CHU Toulouse-Purpan, and Toulouse Institute for Infectious and Inflammatory Diseases (Infinity), University of Toulouse, CNRS, INSERM, UPS, Toulouse, France.

Correspondence to:

Gilles Defer, MD,

Centre de Ressources et Compétence Sclérose en plaques (CRCSEP), Service de Neurologie

CHU de la Côte de Nacre, CAEN-14000, France

defer-gi@chu-caen.fr

Supplemental Figure 1. Flowchart.

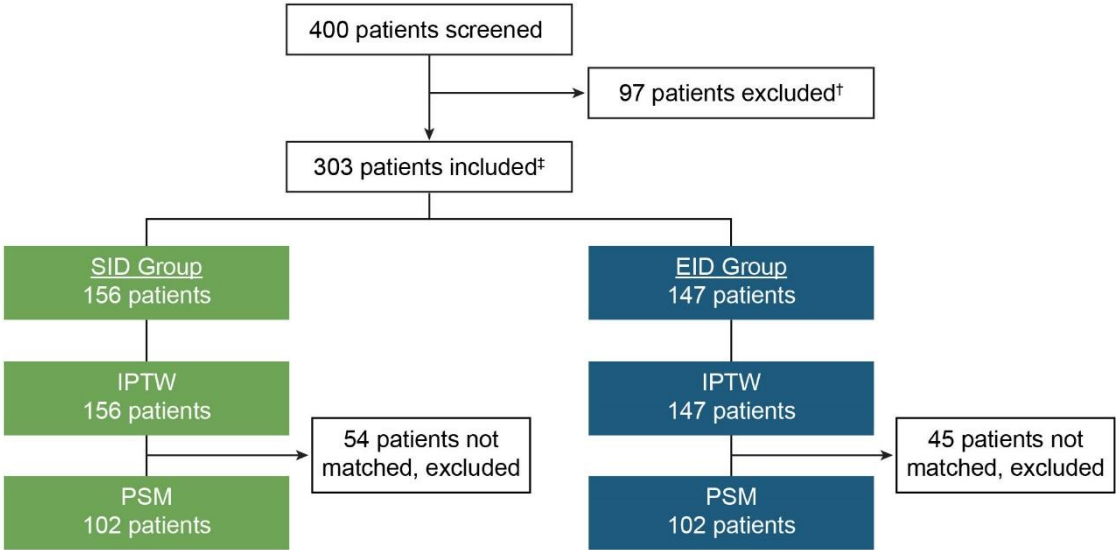

†Fifteen patients (3.7%) presented at least one of the exclusion criteria; 61 patients (15%) did not meet inclusion criteria; and 21 patients (5.2%) were excluded because of missing data.

‡One recruiting center provided patients for the SID group only (Strasbourg), and one center provided patients for the EID group only (Toulouse).

*EID* extended interval dosing, *IPTW* inverse probability treatment weighting, *PSM* propensity score weighting, *SID* standard interval dosing

**Supplemental Table 1.** Baseline characteristics in raw and shrinkage IPTW populations

| Baseline characteristics                                                           | Raw data                  |                           |                             | IPTW (shrinkage)          |                           |                             |
|------------------------------------------------------------------------------------|---------------------------|---------------------------|-----------------------------|---------------------------|---------------------------|-----------------------------|
|                                                                                    | SID group<br>(N = 156)    | EID group<br>(N =147)     | <i>p</i> value <sup>a</sup> | SID group<br>(wN = 129.9) | EID group<br>(wN = 142.3) | <i>p</i> value <sup>b</sup> |
| <b>Age (y), mean (SD)</b>                                                          | 40.2 (10.6)               | 39.3 (9.7)                | 0.467                       | 39.3 (9.8)                | 39.8 (9.5)                | 0.694                       |
| <b>Female, n (%)</b>                                                               | 123 (79)                  | 110 (75)                  | 0.408                       | 102.0 (78)                | 109.8 (77)                | 0.794                       |
| <b>BMI (kg/m<sup>2</sup>), median (IQR)<sup>c</sup></b>                            | 25.0                      | 25.9                      | 0.192                       | 25.1                      | 26.2                      | 0.420                       |
| Weight (kg), mean (SD) <sup>d</sup>                                                | 70.2 (15.7)               | 68.3(15.5)                | 0.374                       | 70.4 (15.3)               | 68.7 (15.7)               | 0.427                       |
| ≤ 80 kg, n (%) <sup>d</sup>                                                        | 132 (85)                  | 117 (80)                  | 0.254                       | 60.8 (73)                 | 105.0 (77)                | 0.495                       |
| Any disease-modifying<br>therapy before natalizumab,<br>n (%)                      | 132 (85)                  | 121 (82)                  | 0.590                       | 106.3 (82)                | 116.4 (82)                | 0.989                       |
| RRMS disease duration at<br>baseline (months), median<br>(IQR)                     | 132.5<br>(72.0–<br>205.0) | 139.0<br>(83.0–<br>199.0) | 0.915                       | 128.0 (63.0–<br>202.0)    | 139 (84.0–<br>199.0)      | 0.557                       |
| <b>ARR at baseline, median<br/>(IQR)</b>                                           | 0.50 (0.23–<br>0.70)      | 0.40 (0.21–<br>0.67)      | 0.214                       | 0.50 (0.20–<br>0.70)      | 0.43 (0.22–<br>0.67)      | 0.417                       |
| <b>Duration of natalizumab<br/>exposure at baseline<br/>(months), median (IQR)</b> | 28.5 (12.0–<br>73.5)      | 27.0 (21.0–<br>54.0)      | 0.259                       | 26.0 (12.0–<br>67.0)      | 27.0 (21.0–<br>56.0)      | 0.053                       |
| <b>Number of relapses at<br/>baseline, median (IQR)</b>                            | 5.0 (3.0–<br>9.0)         | 4.0 (3.0–<br>7.0)         | 0.127                       | 5.0 (3.0–8.0)             | 5.0 (3.0–7.0)             | 0.673                       |
| EDSS score at baseline,<br>median (IQR) <sup>d</sup>                               | 2.0 (1.0–<br>4.0)         | 2.0 (1.0–<br>4.0)         | 0.617                       | 2.0 (1.0–4.0)             | 2.5 (1.0–4.0)             | 0.931                       |
| Positive JCV serology at<br>baseline, n (%) <sup>d</sup>                           | 39 (26)                   | 37 (29)                   | 0.588                       | 32.8 (26)                 | 35.2 (28)                 | 0.813                       |

Variables included in the propensity score model are in boldface type.

*ARR* annualized relapse rate, *BMI* body mass index, *EDSS* Expanded Disability Status Scale, *EID* extended interval dosing, *IPTW* inverse probability treatment weighting, *IQR* interquartile range, *JCV* JC virus, *RRMS* relapsing-remitting multiple sclerosis, *SD* standard deviation, *SID* standard interval dosing, *wN* weighted number

<sup>a</sup>*p* value of Student *t* test or Mann-Whitney U test for continuous variables and chi-square test or Fisher exact test for qualitative variables.

<sup>b</sup>*p* value of Student *t* test or Mann-Whitney U test for continuous variables and chi-square test or Fisher exact test for qualitative variables, weighted on stabilized weights.

<sup>c</sup>Imputation by the mean.

<sup>d</sup>Body weight was missing for 70 patients (23%), EDSS score for 10 patients (3%), and anti-JCV serostatus for 25 patients (8%), respectively.

Supplemental Fig. 2 Standardized mean differences

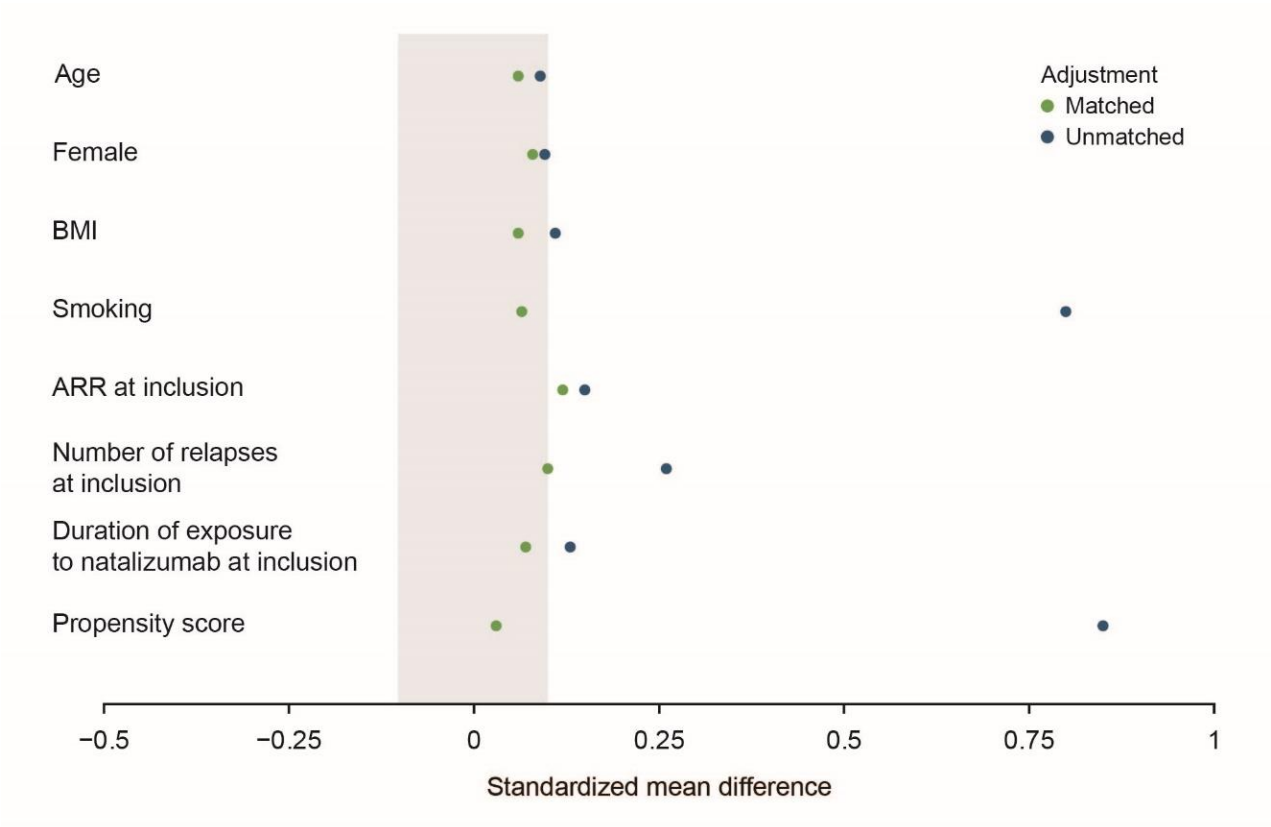

ARR annualized relapse rate, BMI body mass index

**Supplemental Table 2.** Sensitivity analyses of primary endpoint and ARR at 12 months adjusted on therapy groups and ARR at baseline in matched model

| Sensitivity analysis                                                        | Matched model<br>(N = 204) |               |                             |
|-----------------------------------------------------------------------------|----------------------------|---------------|-----------------------------|
|                                                                             | OR                         | 95% CI        | <i>p</i> <sup>a</sup>       |
| <b>Potential factors associated with at least one relapse for 12 months</b> |                            |               |                             |
| <b>Therapy group</b>                                                        |                            |               |                             |
| SID                                                                         | 1                          |               |                             |
| EID                                                                         | 0.63                       | 0.21–1.90     | 0.410                       |
| <b>ARR at baseline</b>                                                      | 1.57                       | 0.63–3.94     | 0.333                       |
| <b>Potential factors associated with ARR at 12 months</b>                   | <b>RR</b>                  | <b>95% CI</b> | <b><i>p</i><sup>b</sup></b> |
| <b>Therapy group</b>                                                        |                            |               |                             |
| SID                                                                         | 1                          |               |                             |
| EID                                                                         | 0.67                       | 0.22–2.02     | 0.543                       |
| <b>ARR at baseline</b>                                                      | 1.71                       | 0.82–3.54     | 0.152                       |

ARR annualized relapse rate, CI confidence interval, EID extended interval dosing, OR odds ratio, RR relative risk, SID standard interval dosing

<sup>a</sup>*p* value obtained by univariate generalized linear model with a binomial distribution taking into account matched data.

<sup>b</sup>*p* value obtained by univariate generalized linear model with a Poisson distribution taking into account matched data.

**Supplemental Table 3.** Change in lesion volume

| MRI endpoint                                                                     | Raw data              |                       | <i>p</i> <sup>a</sup> |
|----------------------------------------------------------------------------------|-----------------------|-----------------------|-----------------------|
|                                                                                  | SID group<br>(n = 44) | EID group<br>(n = 48) |                       |
| Change of lesion volume from baseline to 12 months,<br>median (IQR) <sup>b</sup> | -0.28 (-1.14 to 0.42) | -0.38 (-1.38 to 1.02) | 0.852                 |

*EID* extended interval dosing, *IQR* interquartile range, *MRI* magnetic resonance imaging, *SID* standard interval dosing

<sup>a</sup>*p* value obtained by the Wilcoxon signed rank test.

<sup>b</sup>For lesion volume overall, 211 (70%) patients with missing data, with 112/156 patients (72%) missing data in the SID group and 99/147 patients (67%) missing data in the EID group.

**Supplemental Table 4.** JCV index values

|                                                  | Baseline         |                  | 12-month         |                  |
|--------------------------------------------------|------------------|------------------|------------------|------------------|
|                                                  | SID              | EID              | SID              | EID              |
| Number of patients with anti-JCV index value (n) | 64               | 73               | 141              | 117              |
| Mean (SD)                                        | 0.62 (0.82)      | 0.78 (1.10)      | 0.35 (0.71)      | 0.48 (0.95)      |
| Median (IQR)                                     | 0.32 (0.00–0.84) | 0.23 (0.00–0.95) | 0.00 (0.00–0.52) | 0.00 (0.00–0.47) |
| Min–max                                          | 0.00–3.48        | 0.00–4.55        | 0.00–3.65        | 0.00–3.85        |
| Anti-JCV index (n)                               |                  |                  |                  |                  |
| ≤ 0.9                                            | 50               | 54               | 120              | 96               |
| > 0.9 to ≤ 1.5                                   | 9                | 2                | 14               | 3                |
| > 1.5                                            | 5                | 17               | 7                | 18               |
| Missing                                          | 92               | 74               | 15               | 30               |

*EID* extended interval dosing, *IQR* interquartile range, *JCV* JC virus, *max* maximum, *min* minimum, *SD* standard deviation, *SID* standard interval dosing
